# Supplementary material for: Constitution of a multicentennial multirisk database in a mountainous environment from composite sources: the example of the Vallouise-Pelvoux municipality (Ecrins, France)
Source: Copernicus journal article supplement (doi:10.5194/egusphere-2025-761), 2025-02-25
Supplement: Supplementary file [file egusphere-2025-761-AC1-supplement.pdf]

## Referee 1

### 1) General comments

This is a very interesting manuscript, with a clear aim and methodology. The latter is well executed, with a comprehensive set of results and evidenced discussion. The authors make very good use of existing literature to support most of their writing.

Overall, the manuscript offers an interesting and useful addition to the literature. It demonstrates well the potential of blending multiple evidence sources to develop richer understanding of hazard events.

Below I note some specific and technical comments that I believe would strengthen this manuscript.

Authors' response: We deeply thank Joel Gill for his encouragements and meaningful suggestions that will greatly help us to improve the paper. In what follows, we provide a point-by-point answer to his comments, questions and suggestions.

### 2) Clarity regarding cascading multi-hazards

#### a. Literature.

The manuscript would benefit from a greater engagement with the multi-hazard and multi-risk literature and inclusion of a definition of 'multi-hazard' ([https://www.undrr.org/terminology/hazard#:~:text=Multi%2Dhazard%20means%20\(1\),account%20the%20potential%20interrelated%20effects](https://www.undrr.org/terminology/hazard#:~:text=Multi%2Dhazard%20means%20(1),account%20the%20potential%20interrelated%20effects)) in the opening sections.

Authors' response: A multitude of terms has been proposed to account for increasingly complex hazards and risks, e.g. multi-hazards, cascading hazards, domino effects, compound events, cascading risks, interconnected risks, etc. (e.g. Simpson *et al.*, 2021; Zscheischler *et al.*, 2018). Despite the slight difference in meaning between these different terms, they all emphasize the importance of interactions between hazards and/or exposed elements. In the paper, we use the multirisk concept in a broad sense, namely all single risks and their interactions at the territorial scale, with interactions concerning potentially hazards and/or impacts. Similarly, we define multi-hazards as all single hazards and their interactions at the territorial scale. These definitions are indeed consistent with the one of UNDRR (2017). In the reworked version of the paper, we will make an extra-effort to clarify these definitions and make reference to the one of UNDRR.

#### b. Database.

The manuscript would benefit from clarity as to how cascading multi-hazards are being identified and included in the database. Section 3.4.1, for example, is quite vague – noting that these events are distinct in the database but without a full and detailed explanation as to why and how these are identified. In the results, Table 6 is the only time 'cascading multi-hazard' is included as its own row. It's unclear if this is merged into other categories elsewhere – or omitted.

Authors' response: First, let us recall that the database was built with the objective to avoid any subjectivity, restricting strictly the information recorded to what the sources actually say. Regarding multi-hazards (see our response above regarding definitions), interactions that sources identified correspond all to cascading hazards, namely the 12 pairs of successive hazards for which causal linkages, were reported by the sources. Potentially other types of interactions between hazards may have existed, or other pairs of hazards may have succeed, but the information was not available. In the reworked version of the paper, we will define more clearly cascading hazards as a specific type of multi-hazards, and the sole that could be documented from the analyzed sources.

#### c. Discussion.

There is limited critical reflection in the discussion section about the cascading multi-hazards, including (for example) how few of them there are. Are there genuinely very few cascading multi-hazard events in this region – or is this a function of not having the information to categorize events as being 'cascading multi-hazard', a function of your

definition of 'cascading multi-hazard'? I was hoping for more reflection on this in the discussion, and suggestions of how you could explore this further

Authors' response: See our previous response about subjectivity and the type of interactions in hazards that the sources documented. Potentially, other pairs of hazards could have been linked (or not) but it is impossible to know it with certainty without additional data/information/work. So we cannot fully explain the relatively low number of cascading events in the record so far. However, it is even not obvious that the actual proportion of cascading hazards in the record is really low, because, to our knowledge, reference rates do not really exist in the literature, at least for similar case studies, and it is not necessarily dubious that the number of single avalanches or floods is much higher. Yet, as the record is biased towards damaging events that directly impacted the society, especially far back in the past, it is presumable than some "parts" of cascading hazards that have occurred far away from elements at risk at old times were not reported by the sources, e.g. some of the early floods may have been caused by glacial hazards but we simply do not have the information. This could suggest that the proportion of cascading hazards may be a bit underestimated. To go further, it could be possible to investigate in more details events for which cascading hazards may have occurred, looking for evidence in extra-data. E.g., search for narrative testimonies of photographs of glaciers surface that may suggest the rupture of an underlying water pocket at a time for which a flood exist in our record that does not correspond to intense precipitation or another evident meteorological driver. In parallel a more in-depth study of the perception of hazards by ancient local societies could be conducted, to try to grasp evidences that they perceived or not or not potential linkage between hazards. The discussion of the reworked paper will include these elements.

### 3) Technical Comments

Line 90-93. Include specific sections (Sect 2. Etc) to improve signposting in the manuscript.

Authors' response: The resided paper will be reworked as follows: "In the following, the method used to produce the Vallouise-Pelvoux multirisk database is described (Sect. 3). The dataset and a statistical overview of sources, events and their characteristics are then presented (Sect. 4). Finally, the main characteristics of the spatio-temporal distribution of the events and their drivers (Sect. 5) and potential outlooks (Sect. 6) are discussed".

Figure 1. You note where these images are from, but not the license by which you are reproducing them / confirmation that you have permission to reuse them.

Authors' response: The photographs used come from public archives and can therefore be used freely, especially for research purpose, without the need of an additional license.

Line 120. A source is needed for the information about the surface of glaciers in 2018.

Authors' response: This number was obtained from a careful processing of existing aerial photographs and remote sensing images (Defernand, 2021). We will add the reference and inform about the method used in the revised version of the paper.

Line 195-199. You make reference to the C Series, O Series etc – but it's not clear here what the 'C' or 'O' relates to. An additional sentence or two here to clarify would be useful. Alternatively, signpost to a later section where more information is given.

Authors' response: These letters (sometimes associated to numbers) correspond to the coding system used by the French archives and they do not have an extra specific meaning (e.g. a letter is not the capital letter of a given word). In the revised version of the paper, we will add the precision, and also, at this point of the paper, indicate that the different archive series are detailed in Sect. 3.3.

Figure 2. The figure caption would benefit from a little more detail about the relevance of the alphanumerical codes (e.g., 2C, 1M). The significance of the red writing (difficulties in readability...) is also unclear.

Authors' response: Regarding the archive series, we will add in the figure caption the same precision as in text (see our previous response). Regarding the red boxes (drawn by us), we will indicate "red boxes were drawn to highlight the segments of original text for which a translation is provided".

Line 275. The meaning of 'mobilized sources' is not clear.

Authors' response: We will add the reference to the section where it is defined in the revised version of the paper: « This first set of pre-existing sources used (sect. 3.2), although substantial, presents weaknesses. »

Line 279. In addition to saying 'oldest periods' can you give a date range, to support the reader.

Authors' response: We will add the precision in the revised version of the paper: "we notice a lack of documentation for the oldest periods (1600-1900) which are very important to analyze hazard evolution through time and space."

Line 325. Given 'risk' has quite a specific meaning, should the wording "range of information on risks related to various hazards" actually be something such as: "range of information to characterize various hazards and their impacts".

Authors' response: We will make the correction in the revised version of the paper: "The multirisk database gathers a range of information to characterize various hazards and their impacts: hydrological hazards, rockfalls, avalanches, landslides and glacial hazards". See also our response to the second comment of anonymous referee 2 about risk.

Line 360. Section 4 would benefit from a short opening paragraph outlining what each sub-section will present.

Authors' response: We will add the following opening paragraph in the revised version of the paper: "In Sect. 4.1, the 3,528 hazard mentions gathered from the various sources investigated are presented. Since different mentions may refer to the same hazard and impacts, the whole corpus results in 2,131 single events introduced in Sect. 4.2. Sect 4.3 describes the overall characteristics of these events, while Sect.4.4. focuses on their various impacts and Sect. 4.5 on their temporal distribution."

Line 368. 'The mentions' is not clear given the preceding paragraph. Can you be more specific (all mentions or a sub-set of mentions etc).

Authors' response: We will rework the sentence in the revised version of the paper: The 3,528 mentions concern mostly avalanches (n=2654), floods (n=762) and rockfall (n=88). By contrast, landslides (n=15) and glacial hazards (n=9) represent lower proportions of mentions (Fig. 4B).

Line 390. This is the first point I realise that debris flows are included as part of your 'floods' category. I think this needs to be made clearer earlier on, and justified. Why are they included within this category and not as their own stand-alone category? Are there other hazard 'sub-types' included in each of the hazard categories that you have used? If so – can you explain these earlier in the writing.

Authors' response: Debris flow is a rather « new » concept, at least with regards to the considered > 4 century long study period. To the authors' knowledge, the seminal reference to « lave torrentielle » (debris flow in French) dates back to Surell (1841). As a consequence, older debris flows could not be described as debris flows by sources. And even for the whole nineteen century, the concept was not disseminated broadly, so that sources rather report mud, gravels, flood deposits, etc. It is only from the early 20th century onward that debris flows were largely recognised as genuine processes and therefore registered as different from other torrential floods. At this stage of the work, we did not want to interpret the sources and classify observations as debris flows on the basis of the descriptions at our hand, which would have been at least partially subjective. As a

consequence, for the consistency of the record over the whole study period, we did not make a specific debris flow category, but rather merged them with all other events of hydrological origin as floods, with a more or less large contribution of the solid phasis. Obviously, when the “debris flow information” was available it has been kept. Therefore, further work targeting the various events of hydrological origin in the database could try to go further in their sub-categorisation, exploiting the information already in the database and crossing it with additional useful data, e.g. typical characteristics of the watersheds such as topography or lithology. Note that the other hazard categories we consider also include subcategories which are not always available from sources: shallow and deep landslides for landslides, powder snow avalanche and dense snow avalanches for avalanches etc., but not always. Again, when available this information was kept. In the revised version of the paper, we will precise early on in the paper that debris flows are included within the flood category and better justify why we primarily chose a broad hazard categorisation. We will also include within the discussion a point about the report of hazard types by sources including the emergence of the debris flow concept during the nineteen century.

Line 392. I don't think 'small half' is suitable language. Consider 'just under half' instead.  
Authors' response: We will write 'just under half' in the revised version of the paper.

Line 428. Change synthetizes to synthesizes  
Authors' response: We will make the correction in the revised version of the paper.

Line 431. I don't think it is possible to use the data in Table 4 to say 'caused the most damage' rather 'the most events causing some level of damage' (or equivalent wording) – your numbers don't take into account whether that damage was small or large.  
Authors' response: We will make the correction in the revised version of the paper: « [...] however, the most events causing some level of damage are floods, followed by rockfall, landslides and avalanches.”

Line 450. There is a word missing in the phrase '1,674 damage recorded'. Should it be damage types, or damage categories?  
Authors' response: We will make the correction in the revised version of the paper: “Of the 1,069 events that caused damage, there was a total of 1,674 damage recorded in the four major categories, [...]”

Table 5. Check the spelling of words in this table. Materiel vs. material; vehicules vs vehicles; stuctures vs structures.  
Authors' response: We will make all the required corrections in the revised version of the paper.

Line 466. The phasing 'during which mentions numerous events' is unclear.  
Authors' response: We will rewrite the sentence in the revised version of the paper as « We can also note other rich periods, 1608-1640, 1750-1800 and 1850-1870, although less rich than the 1920-2020 period”

Line 544 (and throughout). Check if a space is needed between a number and % sign.  
Authors' response: yes, we will make the correction in the revised version of the paper.

Line 589. Should 20e century be 20th century?  
Authors' response: We will make the correction in the revised version of the paper: “The temporal distribution of damage mostly concentrated over the 20th century [...]”

Line 620. Suggest avoid using the term 'natural disasters' given current dialogue about it not being an appropriate term. The word 'disasters' should be sufficient.

Authors' response: We will make the correction in the revised version of the paper: "[...] and the absence of destruction and losses due to disasters [...]"

## **References:**

Defernand, C. (2021). Analyse diachronique de l'occupation des sols par classification d'images multi-sources d'une haute vallée alpine du massif des Ecrins. Master thesis. Master de Sciences Humaines et Sociales. Parcours GÉOgraphie, Information, Interface, Durabilité, EnvironnementS. Université Grenoble Alpes, 50p.

Simpson, N. P., Mach, K. J., Constable, A., Hess, J., Hogarth, R., Howden, M., ... & Trisos, C. H. (2021). A framework for complex climate change risk assessment. *One Earth*, 4(4), 489-501.

Surell, A. (1841). Etude sur les torrents des Hautes Alpes, Paris, France, 280p.

United Nations Office for Disaster Risk Reduction - UNDRR (2017). The Sendai Framework Terminology on Disaster Risk Reduction. "Hazard". Accessed 28 June 2025. <https://www.undrr.org/terminology/hazard>.

Zscheischler, J., Westra, S., Van Den Hurk, B. J., Seneviratne, S. I., Ward, P. J., Pitman, A., ... & Zhang, X. (2018). Future climate risk from compound events. *Nature climate change*, 8(6), 469-477.
